# Supplementary material for: Should Tumor Infiltrating Lymphocyes, Androgen Receptor, and FOXA1 expression predict Clinical Outcome in Triple Negative Breast Cancer Patients?
Source: Preprints.org preprint supplement (doi:10.20944/preprints201908.0109.v1), 2019-08-08
Supplement: Supplementary file 1 [file supplementary]

**Supplementary Material**

Table S1. Relationship between tumor markers expression and clinicopathological features

|  |  | ***AR*** | | | | |  | ***FOXA1*** | | | | |  | ***PD-L1*** | | | | |  | ***BRCA1*** | | | | |
| --- | --- | --- | --- | --- | --- | --- | --- | --- | --- | --- | --- | --- | --- | --- | --- | --- | --- | --- | --- | --- | --- | --- | --- | --- |
|  |  | Negative | | Positive | | *p-value* |  | Negative | | Positive | | *p-value* |  | Negative | | Positive | | *p-value* |  | Negative | | Positive | | *p-value* |
| Characteristics |  | n | (%) | n | (%) |  | n | (%) | n | (%) |  | n | (%) | n | (%) |  | n | (%) | n | (%) |
|  |  |  |  |  |  |  |  |  |  |  |  |  |  |  |  |  |  |  |  |  |  |  |  |  |
| *Patient age* |  |  |  |  |  |  |  |  |  |  |  |  |  |  |  |  |  |  |  |  |  |  |  |  |
| ≤ 51 years |  | 53 | (57.6) | 8 | (50.0) | *0.571* |  | 44 | (57.9) | 16 | (43.2) | *0.143* |  | 45 | (54.1) | 15 | (51.7) | *0.817* |  | 23 | (50.0) | 30 | (50.0) | *1.000* |
| > 51 years |  | 39 | (42.4) | 8 | (50.0) |  | 32 | (42.1) | 21 | (56.8) |  | 38 | (45.8) | 14 | (48.3) |  | 23 | (50.0) | 30 | (50.0) |
|  |  |  |  |  |  |  |  |  |  |  |  |  |  |  |  |  |  |  |  |  |  |  |  |  |
| *Pre/Post* |  |  |  |  |  |  |  |  |  |  |  |  |  |  |  |  |  |  |  |  |  |  |  |  |
| Pre |  | 68 | (73.9) | 8 | (50.0) | *0.053* |  | 55 | (72.4) | 20 | (54.1) | *0.053* |  | 54 | (65.1) | 21 | (72.4) | *0.469* |  | 31 | (67.4) | 38 | (63.3) | *0.664* |
| Post |  | 24 | (26.1) | 8 | (50.0) |  |  | 21 | (27.6) | 17 | (45.9) |  |  | 29 | (34.9) | 8 | (27.6) |  |  | 15 | (32.6) | 22 | (36.7) |  |
|  |  |  |  |  |  |  |  |  |  |  |  |  |  |  |  |  |  |  |  |  |  |  |  |  |
| *Histological type* |  |  |  |  |  |  |  |  |  |  |  |  |  |  |  |  |  |  |  |  |  |  |  |  |
| IDC |  | 84 | (91.3) | 15 | (93.8) | *0.836* |  | 69 | (90.8) | 32 | (86.5) | *0.445* |  | 79 | (95.2) | 25 | (86.2) | ***0.048*** |  | 42 | (91.3) | 55 | (91.7) | *0.635* |
| ILC |  | 2 | (2.2) | 0 | (0.0) |  | 1 | (1.3) | 2 | (5.4) |  | 2 | (2.4) | 0 | (0.0) |  | 2 | (4.3) | 1 | (1.7) |
| Other |  | 6 | (6.5) | 1 | (6.2) |  | 6 | (7.9) | 3 | (8.1) |  | 2 | (2.4) | 4 | (13.8) |  | 2 | (4.3) | 4 | (6.7) |
|  |  |  |  |  |  |  |  |  |  |  |  |  |  |  |  |  |  |  |  |  |  |  |  |  |
| *Tumor size (cm)* |  |  |  |  |  |  |  |  |  |  |  |  |  |  |  |  |  |  |  |  |  |  |  |  |
| ≤2 cm |  | 41 | (44.6) | 7 | (43.8) | *0.952* |  | 34 | (44.7) | 19 | (51.4) | *0.508* |  | 42 | (51.2) | 10 | (34.5) | *0.121* |  | 19 | (41.3) | 30 | (50.8) | *0.331* |
| >2 cm |  | 51 | (55.4) | 9 | (56.2) |  | 42 | (55.3) | 18 | (48.6) |  | 40 | (48.8) | 19 | (65.5) |  | 27 | (58.7) | 29 | (49.2) |
|  |  |  |  |  |  |  |  |  |  |  |  |  |  |  |  |  |  |  |  |  |  |  |  |  |
| *Lymph node status* |  |  |  |  |  |  |  |  |  |  |  |  |  |  |  |  |  |  |  |  |  |  |  |  |
| Negative |  | 48 | (53.3) | 7 | (46.7) | *0.632* |  | 40 | (54.1) | 19 | (54.3) | *0.982* |  | 42 | (53.2) | 15 | (51.7) | *0.894* |  | 19 | (42.2) | 33 | (57.9) | *0.116* |
| Positive |  | 42 | (46.7) | 8 | (53.3) |  | 34 | (45.9) | 16 | (45.7) |  | 37 | (46.8) | 14 | (48.3) |  | 26 | (57.8) | 24 | (42.1) |
|  |  |  |  |  |  |  |  |  |  |  |  |  |  |  |  |  |  |  |  |  |  |  |  |  |
| *Histological grade* |  |  |  |  |  |  |  |  |  |  |  |  |  |  |  |  |  |  |  |  |  |  |  |  |
| G1 |  | 0 | (0.0) | 0 | (0.0) | *―* |  | 0 | (0.0) | 1 | (2.8) | ***0.016*** |  | 0 | (0.0) | 0 | (0.0) | *―* |  | 0 | (0.0) | 1 | (1.7) | *0.403* |
| G2 |  | 13 | (14.1) | 5 | (31.2) |  | 9 | (11.8) | 11 | (30.6) |  | 18 | (21.7) | 3 | (10.3) |  | 7 | (15.6) | 15 | (23.3) |
| G3 |  | 79 | (85.9) | 11 | (68.8) |  | 67 | (88.2) | 24 | (66.7) |  | 65 | (78.3) | 26 | (89.7) |  | 38 | (84.4) | 45 | (75.0) |
|  |  |  |  |  |  |  |  |  |  |  |  |  |  |  |  |  |  |  |  |  |  |  |  |  |
| *Ki67* |  |  |  |  |  |  |  |  |  |  |  |  |  |  |  |  |  |  |  |  |  |  |  |  |
| Negative (≤ 20%) |  | 6 | (6.7) | 1 | (6.2) | *0.951* |  | 5 | (6.8) | 6 | (16.2) | *0.116* |  | 11 | (13.4) | 0 | (0.0) | ***0.041*** |  | 4 | (8.7) | 6 | (10.3) | *0.777* |
| Positive (> 20%) |  | 84 | (93.3) | 15 | (93.8) |  | 69 | (93.2) | 31 | (83.8) |  | 71 | (86.6) | 28 | (100.0) |  | 42 | (91.3) | 52 | (89.7) |
|  |  |  |  |  |  |  |  |  |  |  |  |  |  |  |  |  |  |  |  |  |  |  | *continued* | |
|  |  |  |  |  |  |  |  |  |  |  |  |  |  |  |  |  |  |  |  |  |  |  |

|  |  | ***PARP1*** | | | | |  | ***mNHERF1*** | | | | |  | ***cNHERF1*** | | | | |  | ***nNHERF1*** | | | | |
| --- | --- | --- | --- | --- | --- | --- | --- | --- | --- | --- | --- | --- | --- | --- | --- | --- | --- | --- | --- | --- | --- | --- | --- | --- |
|  |  | Negative | | Positive | | *p-value* |  | Negative | | Positive | | *p-value* |  | Negative | | Positive | | *p-value* |  | Negative | | Positive | | *p-value* |
| Characteristics |  | n | (%) | n | (%) |  | n | (%) | n | (%) |  | n | (%) | n | (%) |  | n | (%) | n | (%) |
|  |  |  |  |  |  |  |  |  |  |  |  |  |  |  |  |  |  |  |  |  |  |  |  |  |
| *Patient age* |  |  |  |  |  |  |  |  |  |  |  |  |  |  |  |  |  |  |  |  |  |  |  |  |
| ≤ 51 years |  | 43 | (49.4) | 12 | (60.0) | *0.394* |  | 40 | (52.6) | 24 | (57.1) | *0.638* |  | 30 | (52.6) | 34 | (55.7) | *0.735* |  | 59 | (60.2) | 5 | (25.0) | ***0.004*** |
| > 51 years |  | 44 | (50.6) | 8 | (40.0) |  | 36 | (47.4) | 18 | (42.9) |  | 27 | (47.4) | 27 | (44.3) |  | 39 | (39.8) | 15 | (75.0) |
|  |  |  |  |  |  |  |  |  |  |  |  |  |  |  |  |  |  |  |  |  |  |  |  |  |
| *Pre/Post* |  |  |  |  |  |  |  |  |  |  |  |  |  |  |  |  |  |  |  |  |  |  |  |  |
| Pre |  | 57 | (65.5) | 13 | (65.0) | *0.965* |  | 53 | (69.7) | 27 | (64.3) | *0.544* |  | 39 | (68.4) | 41 | (67.2) | *0.888* |  | 72 | (73.5) | 8 | (40.0) | ***0.004*** |
| Post |  | 30 | (34.5) | 7 | (35.0) |  |  | 23 | (30.3) | 15 | (35.7) |  |  | 18 | (31.6) | 20 | (32.8) |  |  | 26 | (26.5) | 12 | (60.0) |  |
|  |  |  |  |  |  |  |  |  |  |  |  |  |  |  |  |  |  |  |  |  |  |  |  |  |
| *Histological type* |  |  |  |  |  |  |  |  |  |  |  |  |  |  |  |  |  |  |  |  |  |  |  |  |
| IDC |  | 81 | (93.1) | 17 | (85.0) | *0.097* |  | 67 | (88.2) | 39 | (92.9) | *0.679* |  | 52 | (91.2) | 53 | (86.9) | *0.646* |  | 89 | (90.8) | 17 | (85.0) | *0.303* |
| ILC |  | 3 | (3.4) | 0 | (0.0) |  | 2 | (2.6) | 1 | (2.4) |  | 2 | (3.5) | 2 | (3.3) |  | 3 | (3.1) | 0 | (0.0) |
| Other |  | 3 | (3.4) | 3 | (15.0) |  | 7 | (9.2) | 2 | (4.8) |  | 3 | (5.3) | 6 | (9.8) |  | 6 | (6.1) | 3 | (15.0) |
|  |  |  |  |  |  |  |  |  |  |  |  |  |  |  |  |  |  |  |  |  |  |  |  |  |
| *Tumor size (cm)* |  |  |  |  |  |  |  |  |  |  |  |  |  |  |  |  |  |  |  |  |  |  |  |  |
| ≤2 cm |  | 40 | (46.5) | 10 | (50.0) | *0.778* |  | 36 | (48.0) | 19 | (45.2) | *0.774* |  | 31 | (55.4) | 24 | (39.3) | *0.617* |  | 46 | (47.4) | 9 | (45.0) | *0.843* |
| >2 cm |  | 46 | (53.5) | 10 | (50.0) |  | 39 | (52.0) | 23 | (54.8) |  | 25 | (44.6) | 37 | (60.7) |  | 51 | (52.6) | 11 | (55.0) |
|  |  |  |  |  |  |  |  |  |  |  |  |  |  |  |  |  |  |  |  |  |  |  |  |  |
| *Lymph node status* |  |  |  |  |  |  |  |  |  |  |  |  |  |  |  |  |  |  |  |  |  |  |  |  |
| Negative |  | 39 | (46.4) | 12 | (63.2) | *0.188* |  | 43 | (57.3) | 19 | 47.5) | *0.314* |  | 31 | (56.4) | 31 | (51.7) | *0.083* |  | 50 | (52.1) | 12 | (63.2) | *0.376* |
| Positive |  | 45 | (53.6) | 7 | (36.8) |  | 32 | (42.7) | 21 | (52.5) |  | 24 | (43.6) | 29 | (48.3) |  | 46 | (47.9) | 7 | (36.8) |
|  |  |  |  |  |  |  |  |  |  |  |  |  |  |  |  |  |  |  |  |  |  |  |  |  |
| *Histological grade* |  |  |  |  |  |  |  |  |  |  |  |  |  |  |  |  |  |  |  |  |  |  |  |  |
| G1 |  | 1 | (1.2) | 0 | (0.0) | *0.155* |  | 0 | (0.0) | 1 | (2.4) | *0.701* |  | 0 | (0.0) | 1 | (1.7) | *0.614* |  | 1 | (1.0) | 0 | (0.0) | *0.539* |
| G2 |  | 20 | (23.3) | 1 | (5.0) |  | 14 | (18.4) | 6 | (14.6) |  | 10 | (17.5) | 10 | (16.7) |  | 15 | (15.5) | 5 | (25.0) |
| G3 |  | 65 | 75.6) | 19 | (95.0) |  | 62 | (81.6) | 34 | (82.9) |  | 47 | (82.5) | 49 | (81.7) |  | 81 | (83.5) | 15 | (75.0) |
|  |  |  |  |  |  |  |  |  |  |  |  |  |  |  |  |  |  |  |  |  |  |  |  |  |
| *Ki67* |  |  |  |  |  |  |  |  |  |  |  |  |  |  |  |  |  |  |  |  |  |  |  |  |
| Negative (≤ 20%) |  | 11 | (12.9) | 0 | (0.0) | *0.089* |  | 6 | (7.9) | 4 | (10.0) | *0.701* |  | 5 | (8.8) | 5 | (8.5) | *0.955* |  | 8 | (8.3) | 2 | (10.0) | *0.809* |
| Positive (> 20%) |  | 74 | (87.1) | 20 | (100.0) |  | 70 | (92.1) | 36 | (90.0) |  | 52 | (91.2) | 54 | (91.5) |  | 88 | (91.7) | 184 | (90.0) |
|  |  |  |  |  |  |  |  |  |  |  |  |  |  |  |  |  |  |  |  |  |  |  |  |  |

IDC: Invasive Ductal Carcinoma; ILC: Invasive Lobular Carcinoma; AR: Androgen Receptor; FOXA1: Forkhead box A1; PD-L1: progammed cell death ligand-1; BRCA1: breast cancer susceptibility protein 1; PARP1: Poly [ADP-Ribose] Polymerase 1; Tumor-infiltrating lymphocytes (TILs); mNHERF1: membranous Na+/H+ Exchanger Regulatory Factor 1; cNHERF1: cytoplasmic NHERF1; nNHERF1: nuclear NHERF1.

**Table S2** Dilution, source, staining of antibodies and cut off used

| **Biomarkers** | **Dilution** | **Source/clone** | **Staining localization** | **Cut off (range)** | |
| --- | --- | --- | --- | --- | --- |
| NHERF1 | 1:150 | Affinity Bioreagents, rabbit polyclonal EBP50, PA1-090 | membrane | >0%* | (0-90%) |
| cytoplasmic | ≥70%* | (0-100%) |
| nuclear | >0%* | (0-70%) |
| BRCA1 | 1:75 | Calbiochem, mouse monoclonal anti-BRCA1, MS110 | nuclear | ≥3%* | (0-90%) |
| PARP1 | 1:100 | Santa Cruz, mouse monoclonal, F-2 nuclear | nuclear | ≥10** (0– | (0-18) |

*median value; ** quick score method. NHERF1: Na+/H+ Exchanger Regulatory Factor 1; BRCA1: breast cancer susceptibility protein 1; PARP1: Poly [ADP-Ribose] Polymerase 1.

**
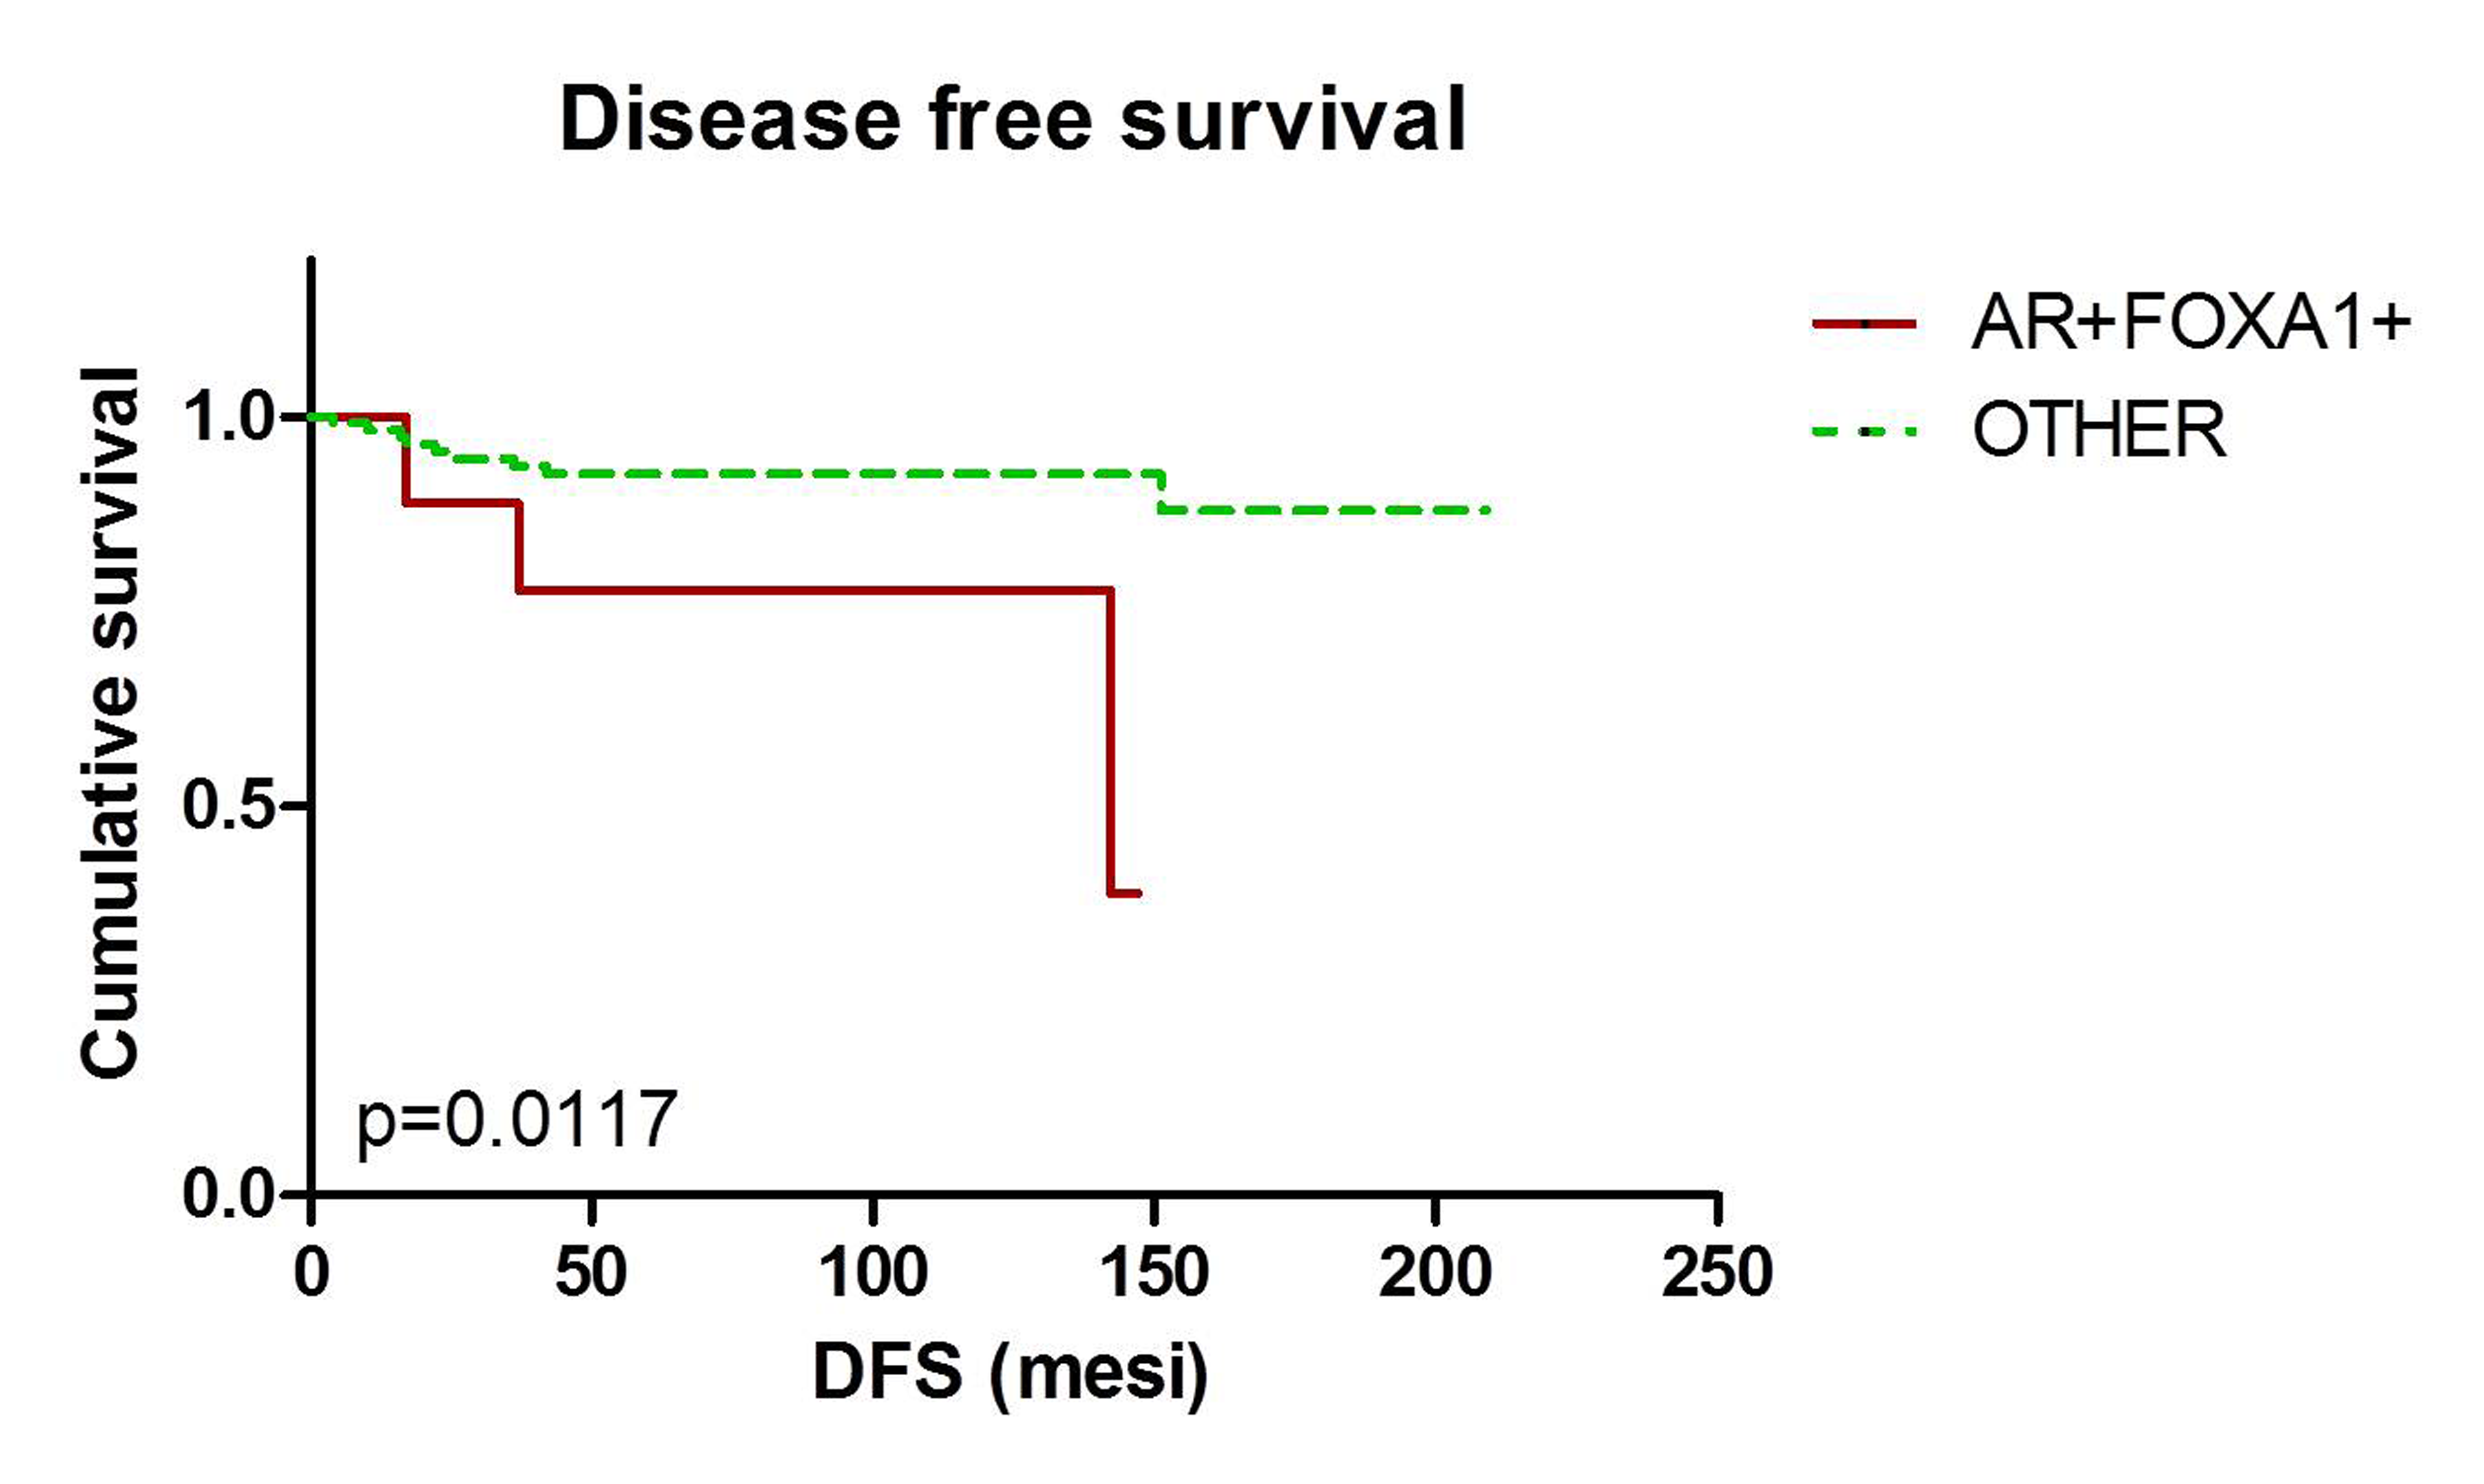
**

**Figure S1** Survival analysis. DFS curves for patients with simultaneously AR+/FOXA1+ phenotype respect to all other tumors (p=0.0117).

**
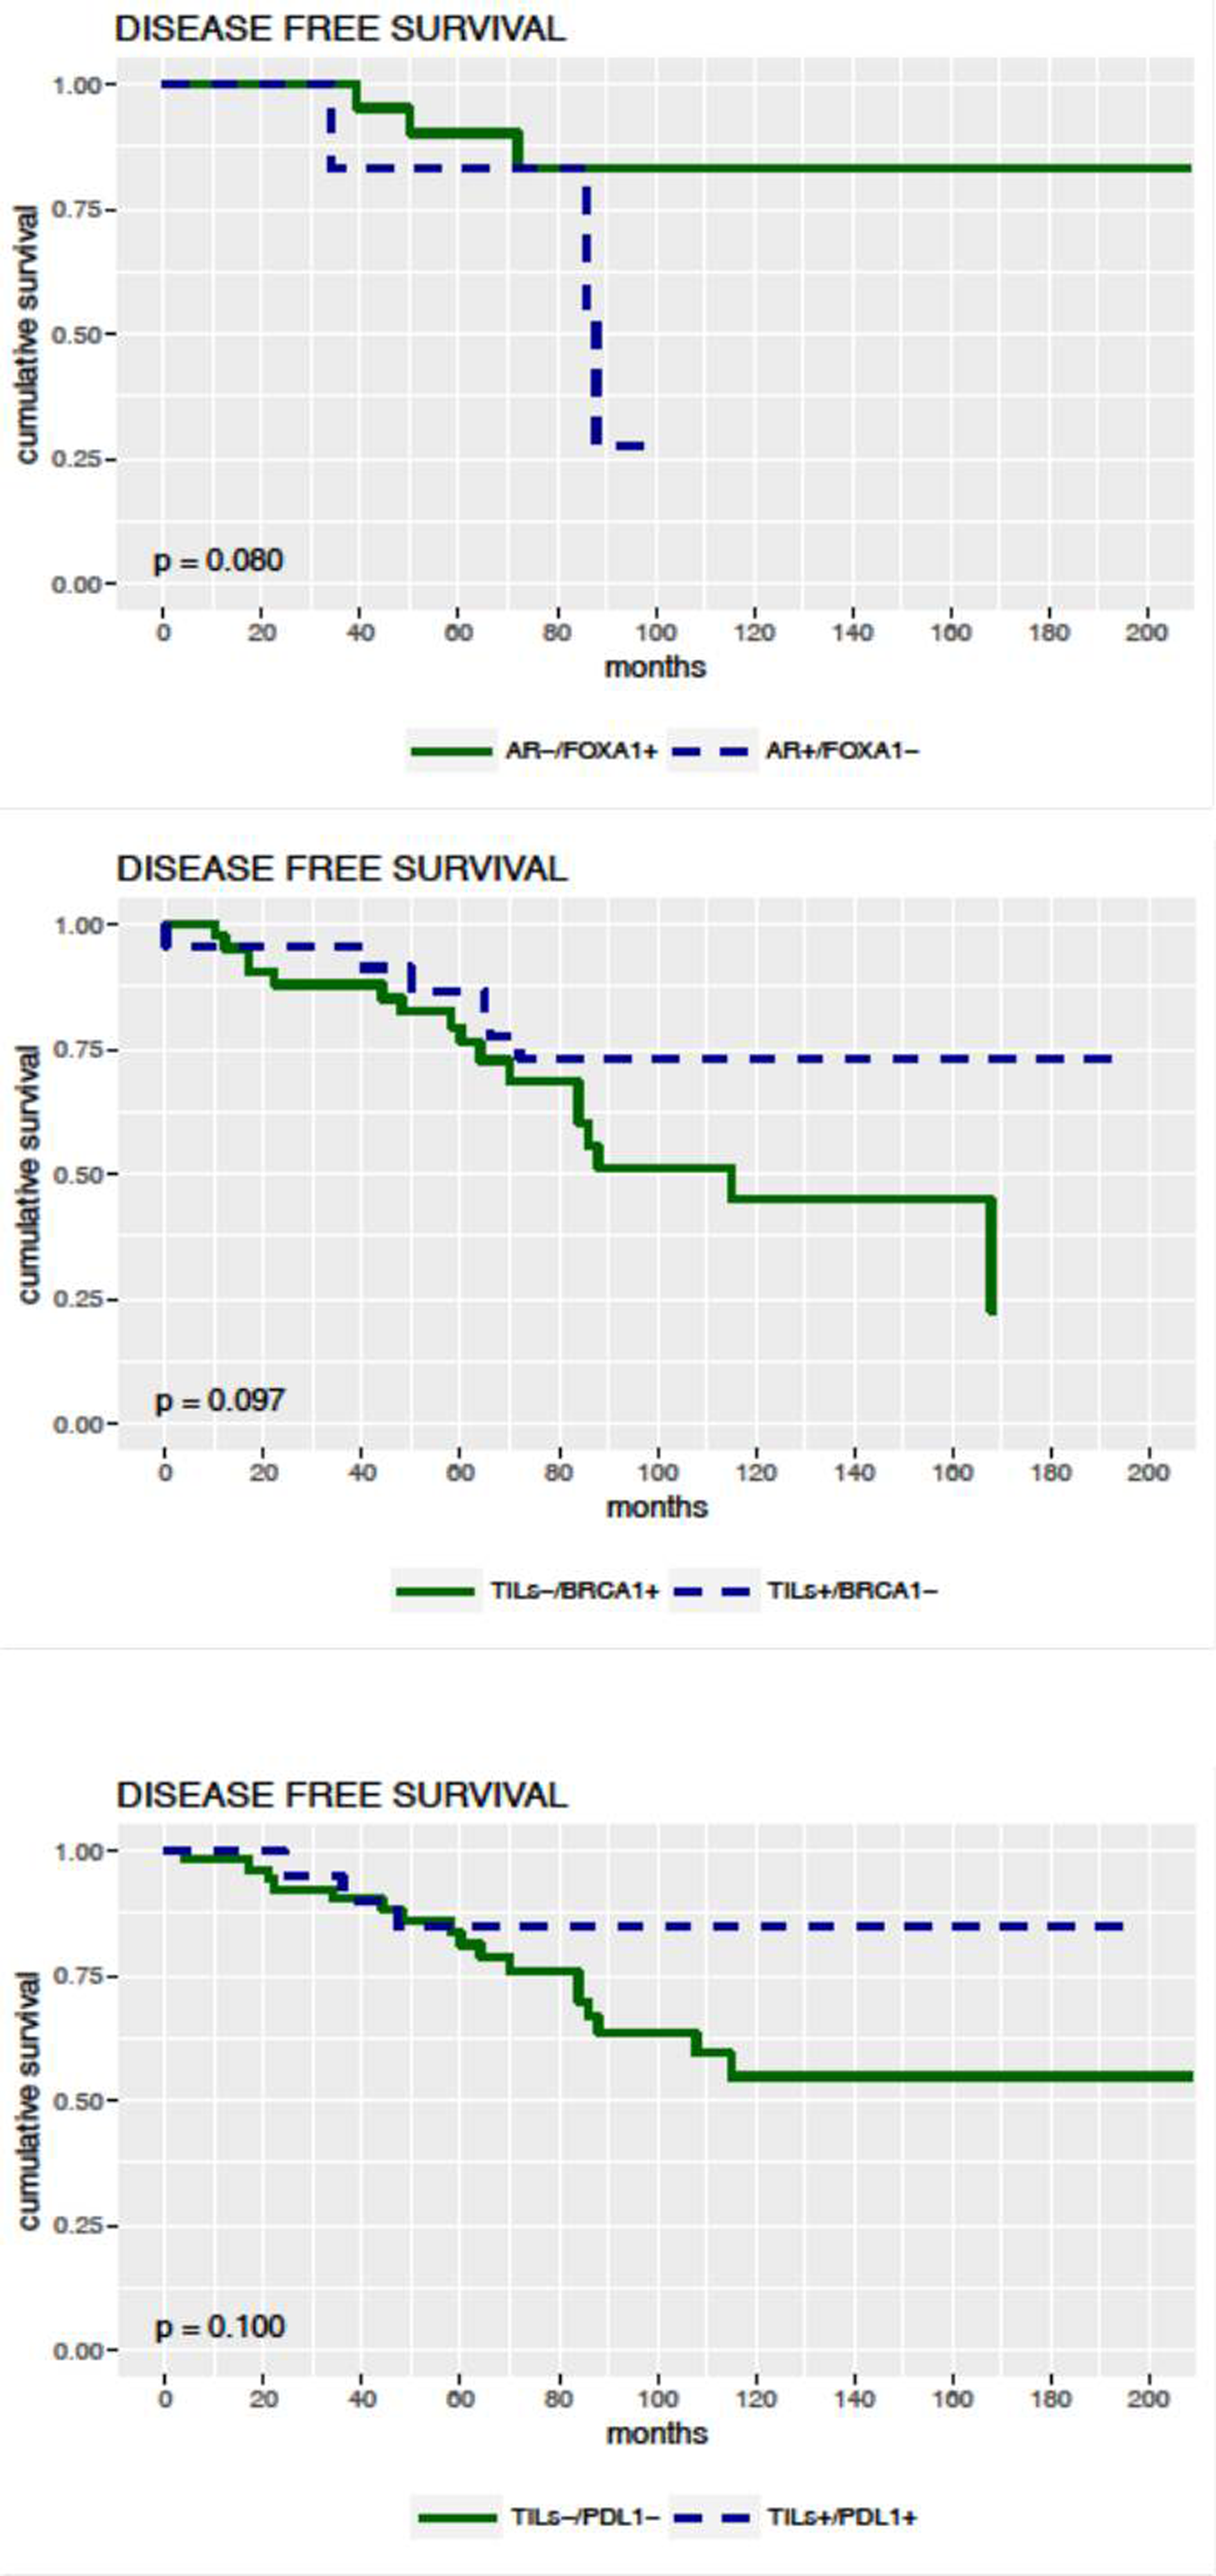
**

**Figure S2** Survival analyses. DFS curves for patients with simultaneously AR-/FOXA1+ vs AR+/FOXA1- (p=0.080). TILs−/BRCA1+ vs to TILs+/BRCA1- (p=0.097) and

TILs+/PD-L1+ Vs TILs-/PD-L1- (p=0.100) expression
